# Supplementary material
Source: PubMed Central journal article supplement (PMC4635229)
Supplement: jcbfm2015114x1.pdf [file jcbfm2015114x1.pdf]

## **SUPPLEMENTARY MATERIAL**

### **Supplementary Table-1**

Color scales with the associated hex-color values used for CVR, ssCVR and  $\tau$  maps.

### **Supplementary Table-2 - Patient Characteristics**

### **Supplementary Figure 1**

Maps of CVR, z-CVR and z- $\tau$  for patients number 01 to 10.

Color scales are provided in Figures 4, 5, 6 and Supplementary Table-1

### **Supplementary Figure 2**

Maps of CVR, z-CVR and z- $\tau$  for patients number 11 to 20.

Color scales are provided in Figures 4, 5, 6 and Supplementary Table-1

### Supplementary Table 1

Color scales with the associated hex-color values used for CVR, ssCVR and  $\tau$  maps.

| CVR / ssCVR   | Hex-color values for a discrete color scale |
|---------------|---------------------------------------------|
| 0.65 : 0.70   | #5B004E                                     |
| 0.45 : 0.65   | #890056                                     |
| 0.35 : 0.45   | #C80041                                     |
| 0.30 : 0.35   | #DC0000                                     |
| 0.27 : 0.30   | #EF0300                                     |
| 0.24 : 0.27   | #EF2200                                     |
| 0.20 : 0.24   | #FF3900                                     |
| 0.15 : 0.20   | #DC4A00                                     |
| 0.10 : 0.15   | #DC7800                                     |
| 0.05 : 0.10   | #FFAC00                                     |
| 0.025 : 0.05  | #FFFE2A                                     |
| 0 : 0.025     | #FFE288                                     |
| 0 : -0.025    | #B8FFD9                                     |
| -0.025 : 0.05 | #71FFE6                                     |
| -0.05 : -0.10 | #A0E3FF                                     |
| 0.10 : -0.15  | #42C7FF                                     |
| -0.15 : -0.20 | #9688FF                                     |
| -0.20 : -0.30 | #632AFF                                     |
| -0.30 : -0.40 | #500C80                                     |
| -0.40 : -0.70 | #120089                                     |

| Z scores     | Hex-color values for a discrete color scale |
|--------------|---------------------------------------------|
| 1.75 : 2     | #990000                                     |
| 1.5 : 1.75   | #FF0000                                     |
| 1.25 : 1.5   | #FF6600                                     |
| 1 : 1.25     | #FF9933                                     |
| 0.5 : 1      | #FFFF00                                     |
| 0 : 0.5      | #FFF0CC                                     |
| 0 : -0.5     | #CCFFFF                                     |
| -0.5 : -1    | #00CCFF                                     |
| -1 : -1.25   | #FF99FF                                     |
| -1.25 : -1.5 | #CC99FF                                     |
| -1.5 : -1.75 | #6600CC                                     |
| -1.75 : -2   | #000033                                     |

| $\tau$ (ssCVR>0) | Hex-color values for a continuous color scale |
|------------------|-----------------------------------------------|
| 100              | #009900                                       |
| 90               | #00FF00                                       |
| 50               | #FFFF00                                       |
| 40               | #FFFF00                                       |
| 0.01             | #FF0000                                       |

| $\tau$ (ssCVR<0) | Hex-color values for a continuous color scale |
|------------------|-----------------------------------------------|
| 100              | #9F00FF                                       |
| 50               | #0000FF                                       |
| 0                | #00FFFF                                       |

**Supplementary Table 2. Patient Characteristics**

| Case No. | Age, Years | Sex | Side of Steno-occlusive Disease | Angiographic Findings, Affected hemisphere                                                     | Angiographic Findings, Unaffected Hemisphere |
|----------|------------|-----|---------------------------------|------------------------------------------------------------------------------------------------|----------------------------------------------|
| 01       | 53         | M   | L                               | High-grade supraclinoid ICA stenosis                                                           | No abnormality                               |
| 02       | 63         | M   | L                               | ICA occlusion at carotid siphon                                                                | No abnormality                               |
| 03       | 83         | M   | L                               | Occlusion of supraclinoid ICA, hypoplastic P1, large left pcom.                                | No abnormality                               |
| 04       | 75         | M   | L                               | Proximal ICA occlusion near bifurcation                                                        | Hypoplastic right vertebral                  |
| 05       | 55         | M   | L                               | High-grade petrous ICA stenosis, small cavernous portion, narrow M1 segment, narrow A1 segment | No abnormality                               |
| 06       | 63         | M   | L                               | ICA occlusion at carotid siphon                                                                | No abnormality                               |
| 07       | 54         | F   | L                               | ICA occlusion at carotid siphon                                                                | No abnormality                               |
| 08       | 67         | F   | L                               | ICA occlusion at supraclinoid segment                                                          | No abnormality                               |
| 09       | 74         | M   | L                               | ICA occlusion at carotid siphon                                                                | No abnormality                               |
| 10       | 59         | M   | R                               | Distal ICA occlusion                                                                           | No abnormality                               |
| 11       | 35         | M   | R                               | High-grade cervical ICA stenosis, hypoplastic M1 segment                                       | No abnormality                               |
| 12       | 60         | M   | R                               | ICA occlusion at origin                                                                        | 30% cavernous ICA stenosis                   |
| 13       | 70         | M   | R                               | ICA occlusion at carotid siphon                                                                | No abnormality                               |

|    |    |   |   |                                                                     |                                             |
|----|----|---|---|---------------------------------------------------------------------|---------------------------------------------|
| 14 | 85 | M | R | ICA occlusion at carotid bifurcation in neck                        | No abnormality                              |
| 15 | 67 | M | R | High-grade ICA stenosis at carotid siphon, hypoplastic M1 segment   | No abnormality                              |
| 16 | 62 | F | R | Supraclinoid ICA occlusion                                          | No abnormality                              |
| 17 | 25 | M | R | High-grade ICA stenosis near termination, narrow A1 and M1 segments | No abnormality                              |
| 18 | 79 | M | R | High-grade stenosis near carotid bifurcation in neck                | Mild stenosis in proximal extracranial ICA  |
| 19 | 56 | M | R | ICA occlusion at cervical segment                                   | Mild ICA stenosis after carotid bifurcation |
| 20 | 46 | M | R | ICA occlusion                                                       | No abnormality                              |

M indicates male; F, female; L, left; R, right; PCA, posterior cerebral artery; ICA, internal carotid artery



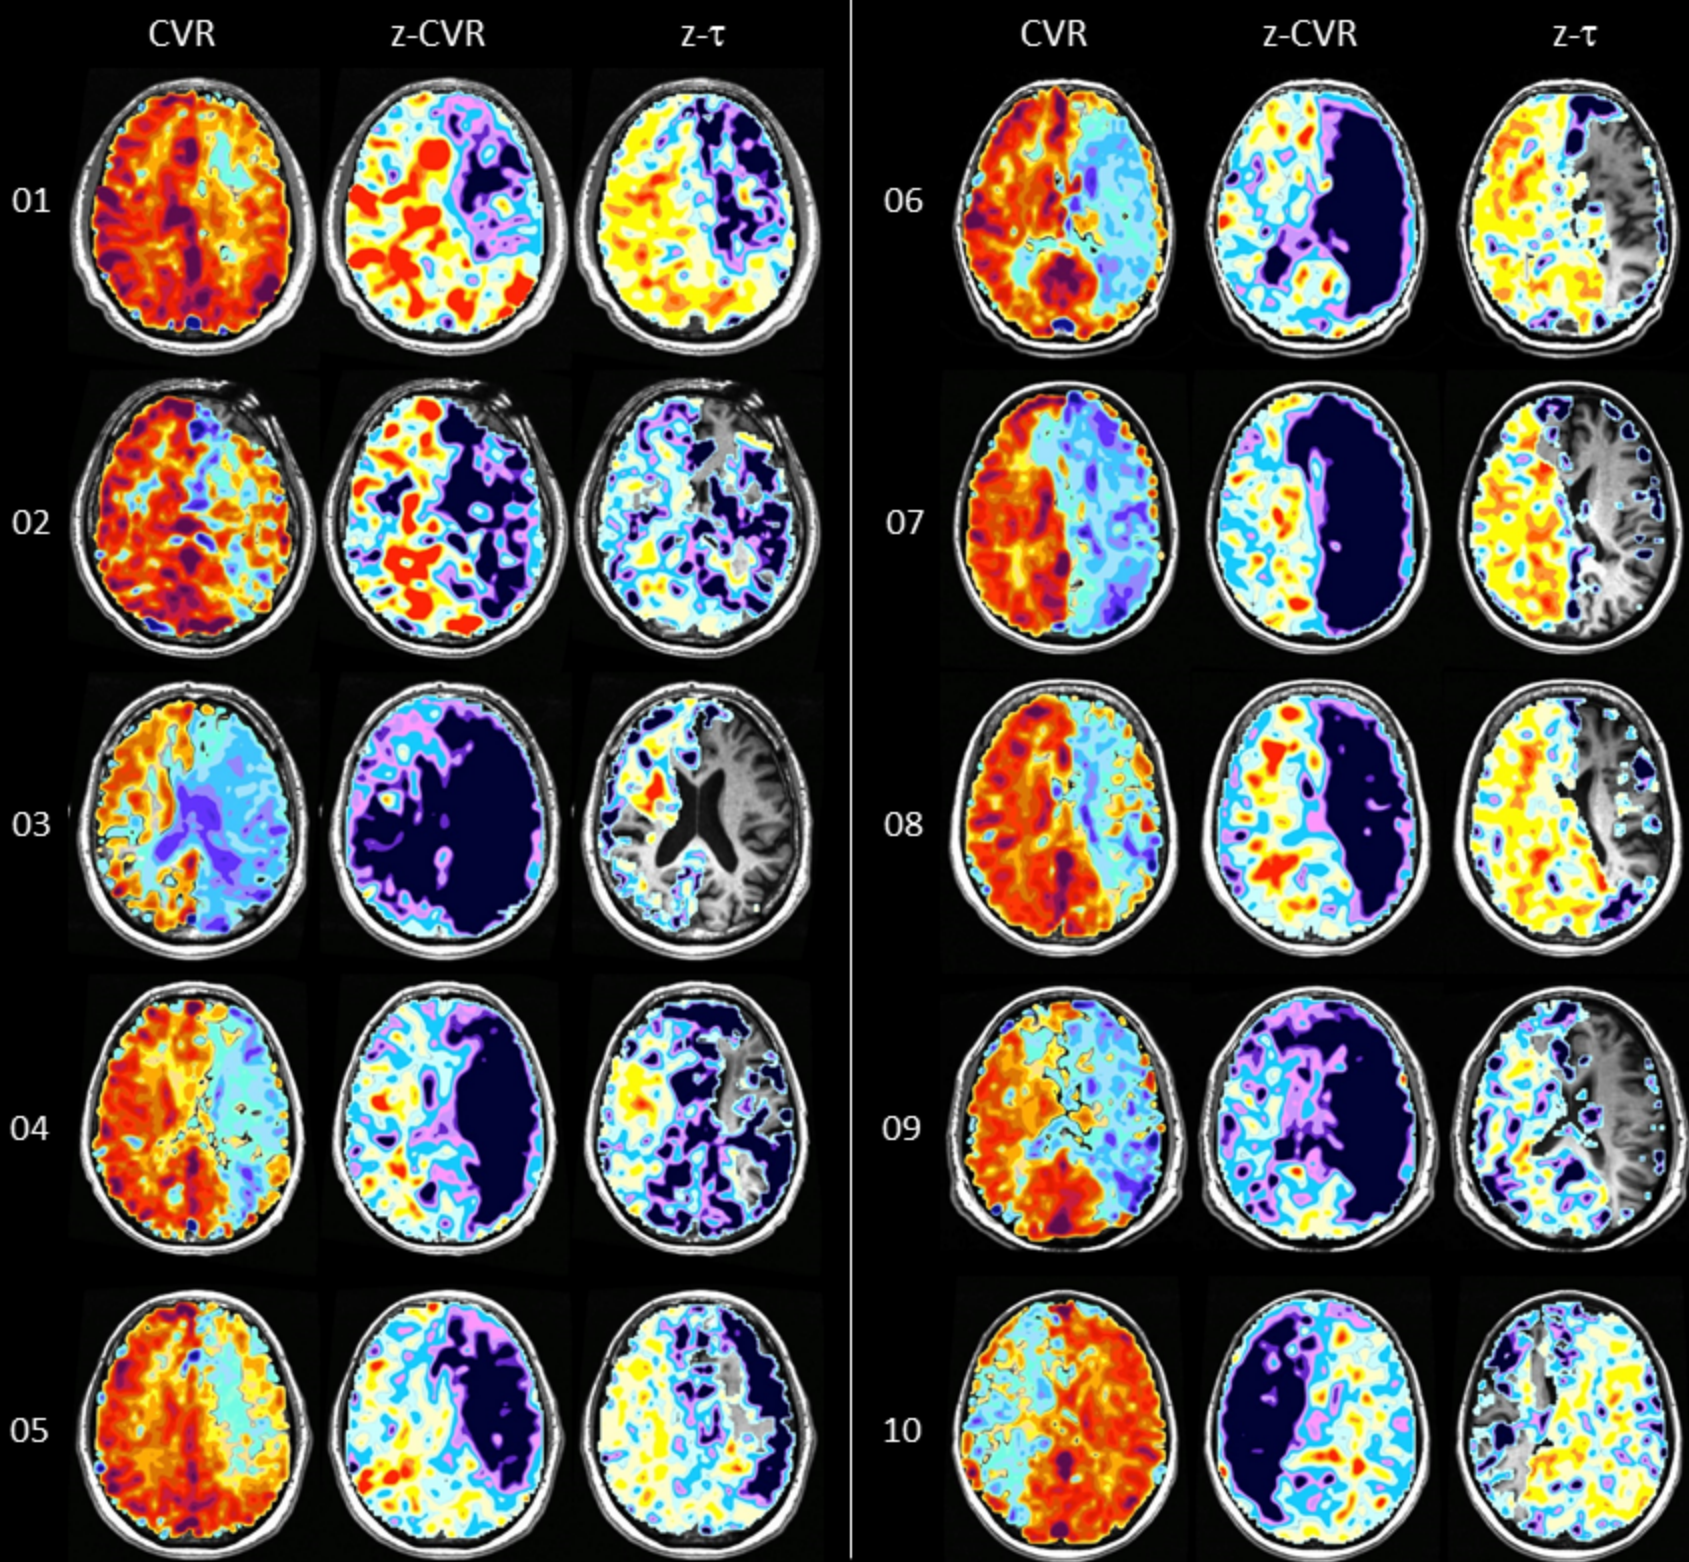

Supplementary Figure-1



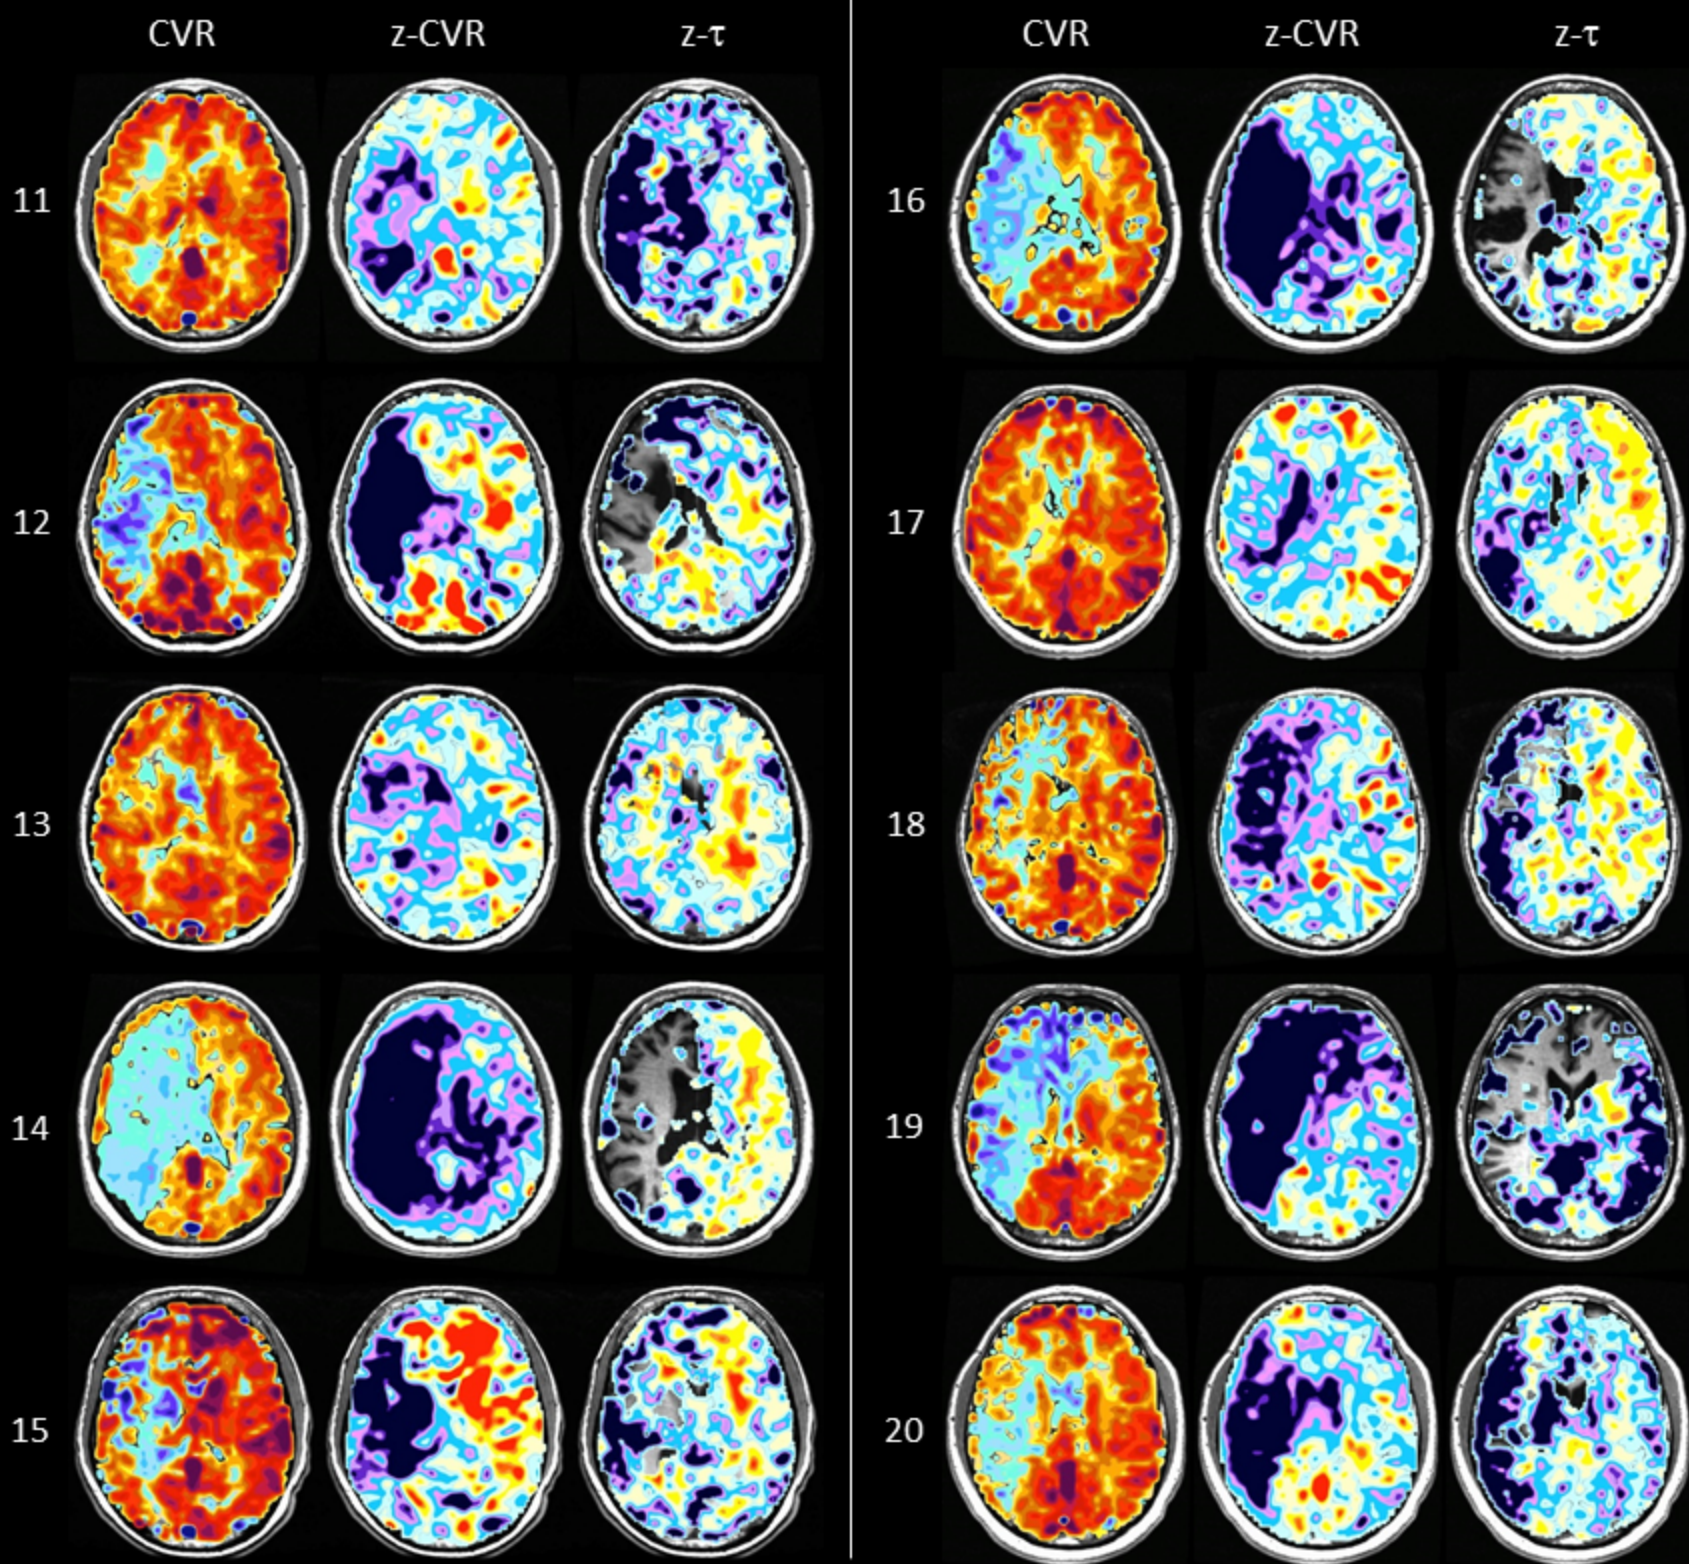

Supplementary Figure-2
